# Supplementary material for: Bulk (in)stability as a possible source of surface reconstruction
Source: Royal Society of Chemistry journal article supplement (doi:10.1039/d0cp03819a), 2020-01-01

## Bulk (in)stability as a possible source or surface reconstruction

Marc Figueras,<sup>‡</sup> Anabel Jurado,<sup>‡</sup> Ángel Morales-García, Francesc Viñes and Francesc Illas\*

*Departament de Ciència de Materials i Química Física & Institut de Química Teòrica i Computacional (IQTCUB), Universitat de Barcelona. c/ Martí i Franquès 1-11, 08028  
Barcelona, Spain*

\* Corresponding author e-mail: [francesc.illas@ub.edu](mailto:francesc.illas@ub.edu)

<sup>‡</sup> Both authors equally contributed

**Table. S1.** Influence of the plane-wave kinetic energy cutoff and vacuum width on the surface energy for a (2×2) MoC supercell surface model containing four atomic layers. All surface energy values are in J/m<sup>2</sup>.

| <b>Plane Wave kinetic energy Cutoff</b> | <b>415 eV</b> | <b>500 eV</b> |
|-----------------------------------------|---------------|---------------|
| Relaxed surface energy                  | 0.67          | 0.67          |
| Fixed surface energy                    | 1.41          | 1.41          |
| <b>Vacuum width</b>                     | <b>15 Å</b>   | <b>20 Å</b>   |
| kinetickiRelaxed surface energy         | 0.67          | 0.67          |
| Fixed surface energy                    | 1.41          | 1.41          |

**Table. S2.** Influence of the slab model thickness on the surface energy. Calculations are reported for two (2×2) supercell models, one with 4 atomic layers (2 relaxed + 2 frozen) and one with 8 atomic layers (6 relaxed + 2 frozen). All surface energy values are in J/m<sup>2</sup>.

| <b>Thickness</b>       | <b>4 layers (2+2)</b> | <b>8 layers (2+6)</b> |
|------------------------|-----------------------|-----------------------|
| Fixed surface energy   | 1.41                  | 1.44                  |
| Relaxed surface energy | 0.67                  | 0.48                  |

**Figure S1.** Initial configurations of the alternative reconstruction patterns studied in the (4×4) supercell of MoC (001) surface. Purple and black spheres correspond to Mo and C atoms, respectively. Atoms displacements are shown by arrows.

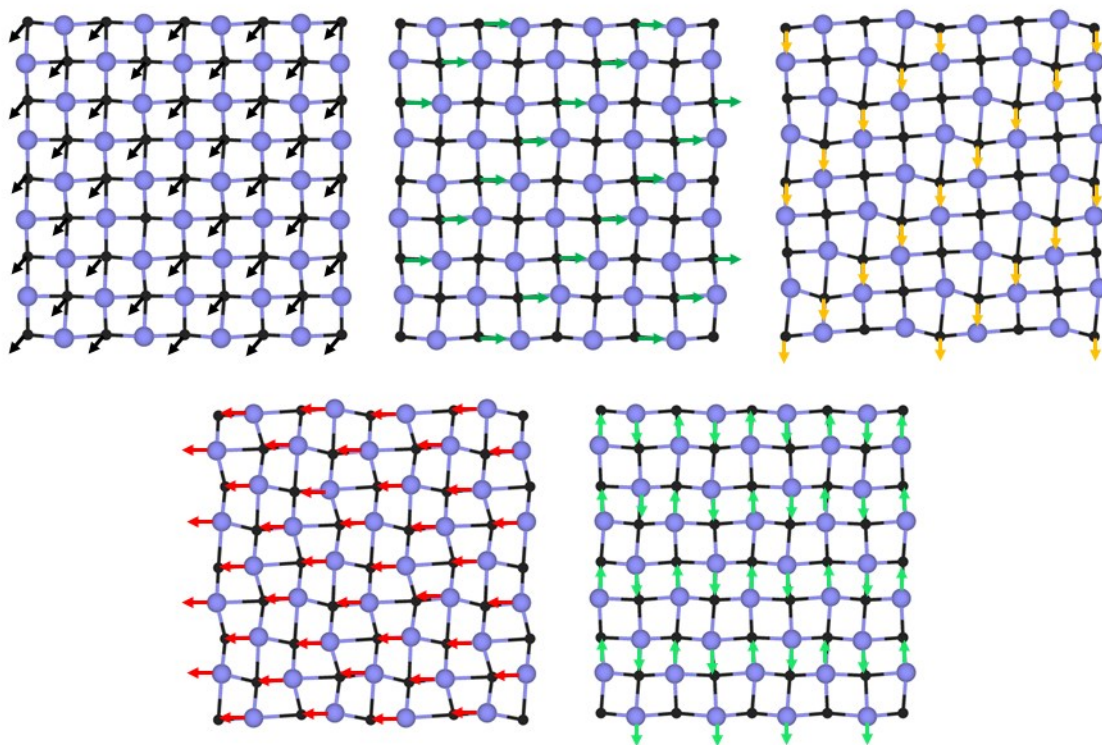

**Figure. S2.** First (top panels) and second (bottom panels) atomic layer for fixed (bulk-truncated) vs. reconstructed ( $2\times 2$ ) supercells of the MoN (001) surface. Violet and cyan spheres correspond to Mo and N atoms, respectively.

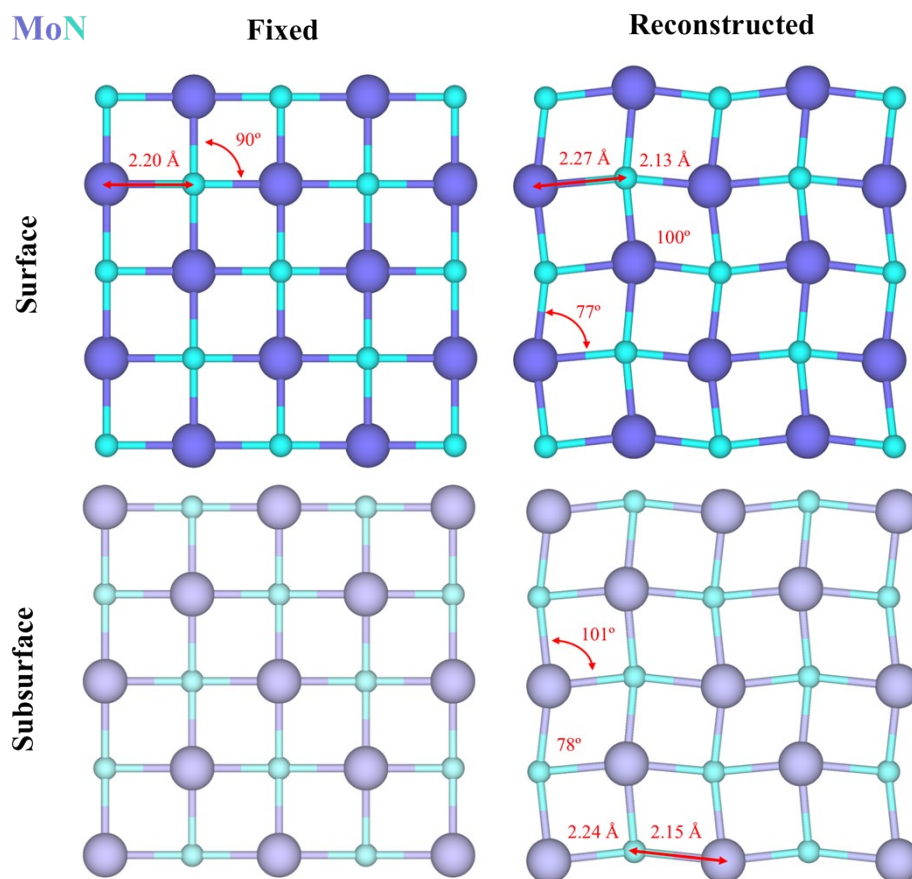

**Figure S3.** First (top panels) and second (bottom panels) atomic layer for fixed (bulk-truncated) vs. reconstructed ( $2\times 2$ ) supercells of the  $\gamma$ -WC (001) surface. Grey and black spheres correspond to W and C atoms, respectively.

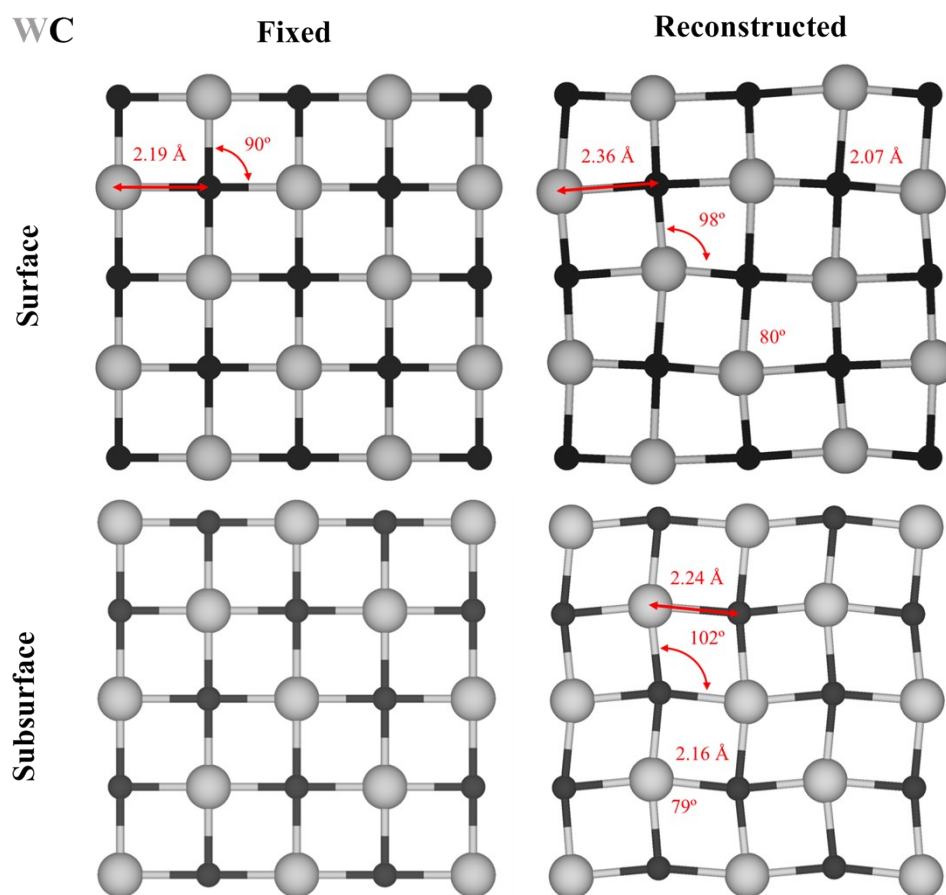

**Figure S4.** First (top panels) and second (bottom panels) atomic layer for fixed (bulk-truncated) vs. reconstructed ( $2\times 2$ ) supercells of the WN (001) surface. Grey and cyan spheres correspond to W and N atoms, respectively.

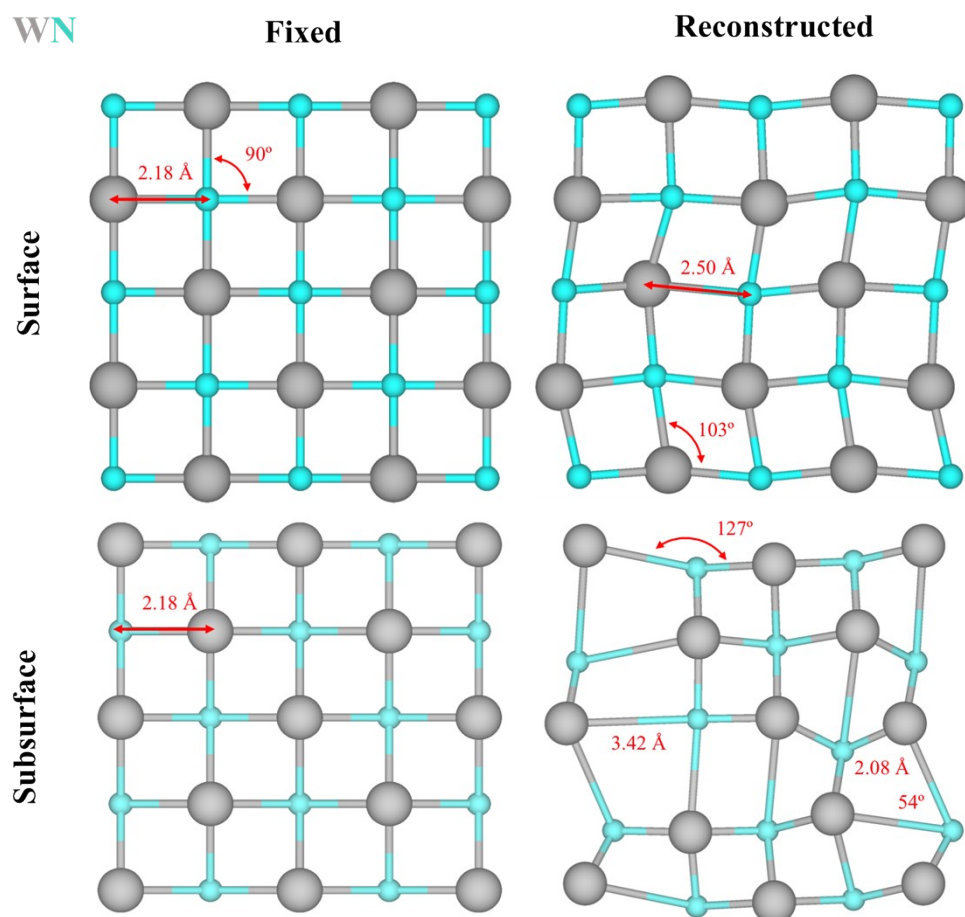

Supplement: d0cp03819a1.pdf [file d0cp03819a1.pdf]
